# Supplementary figures and images for: Ceramide levels in blood plasma correlate with major depressive disorder severity and its neutralization abrogates depressive behavior in mice
Source: PubMed Central journal article supplement — J Biol Chem. 2022 Jun 24;298(8):102185. doi: 10.1016/j.jbc.2022.102185 (PMC9304786; doi:10.1016/j.jbc.2022.102185), 2022-06-24

**S-Fig. 1**

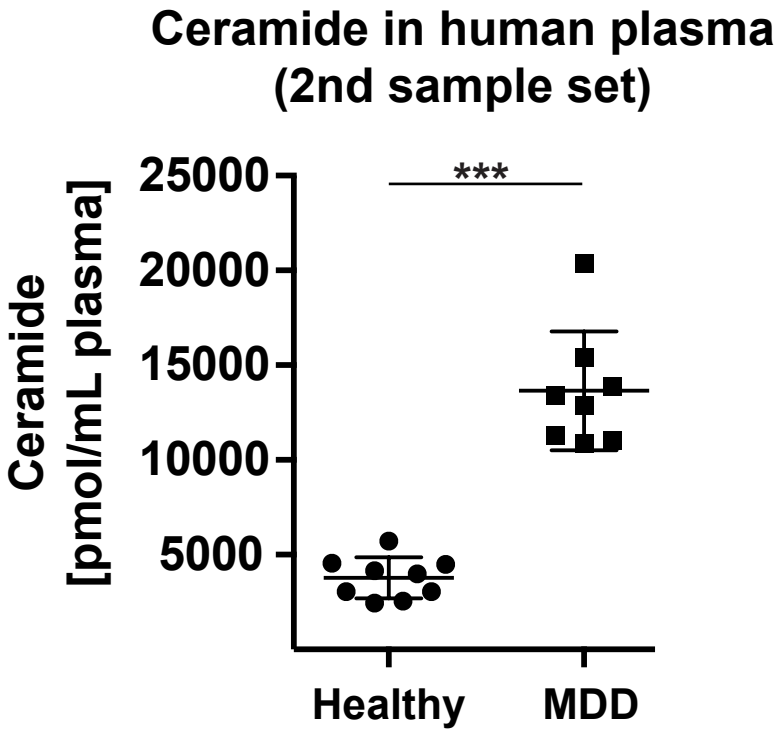

Supplement: mmc3.pdf [file mmc3.pdf]

**S-Fig. 2**

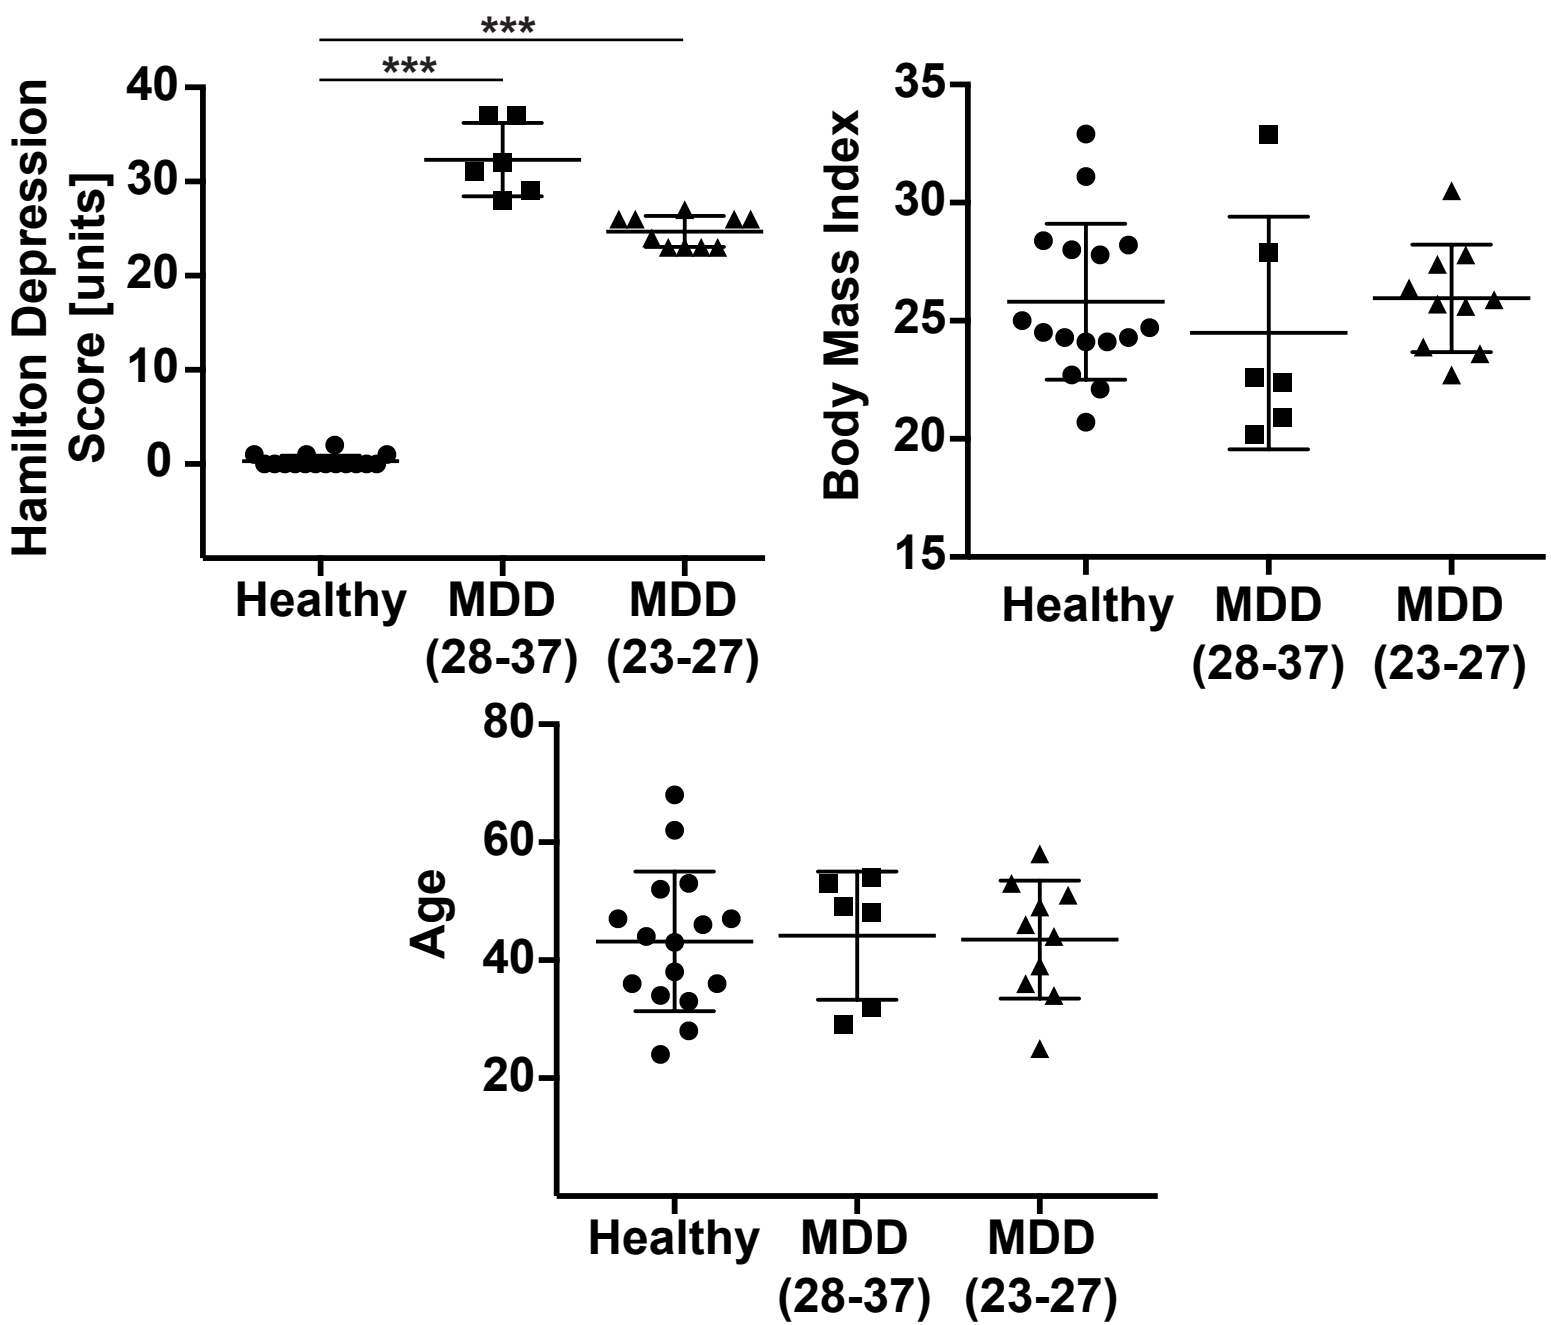

Supplement: mmc4.pdf [file mmc4.pdf]

# S-Fig. 3

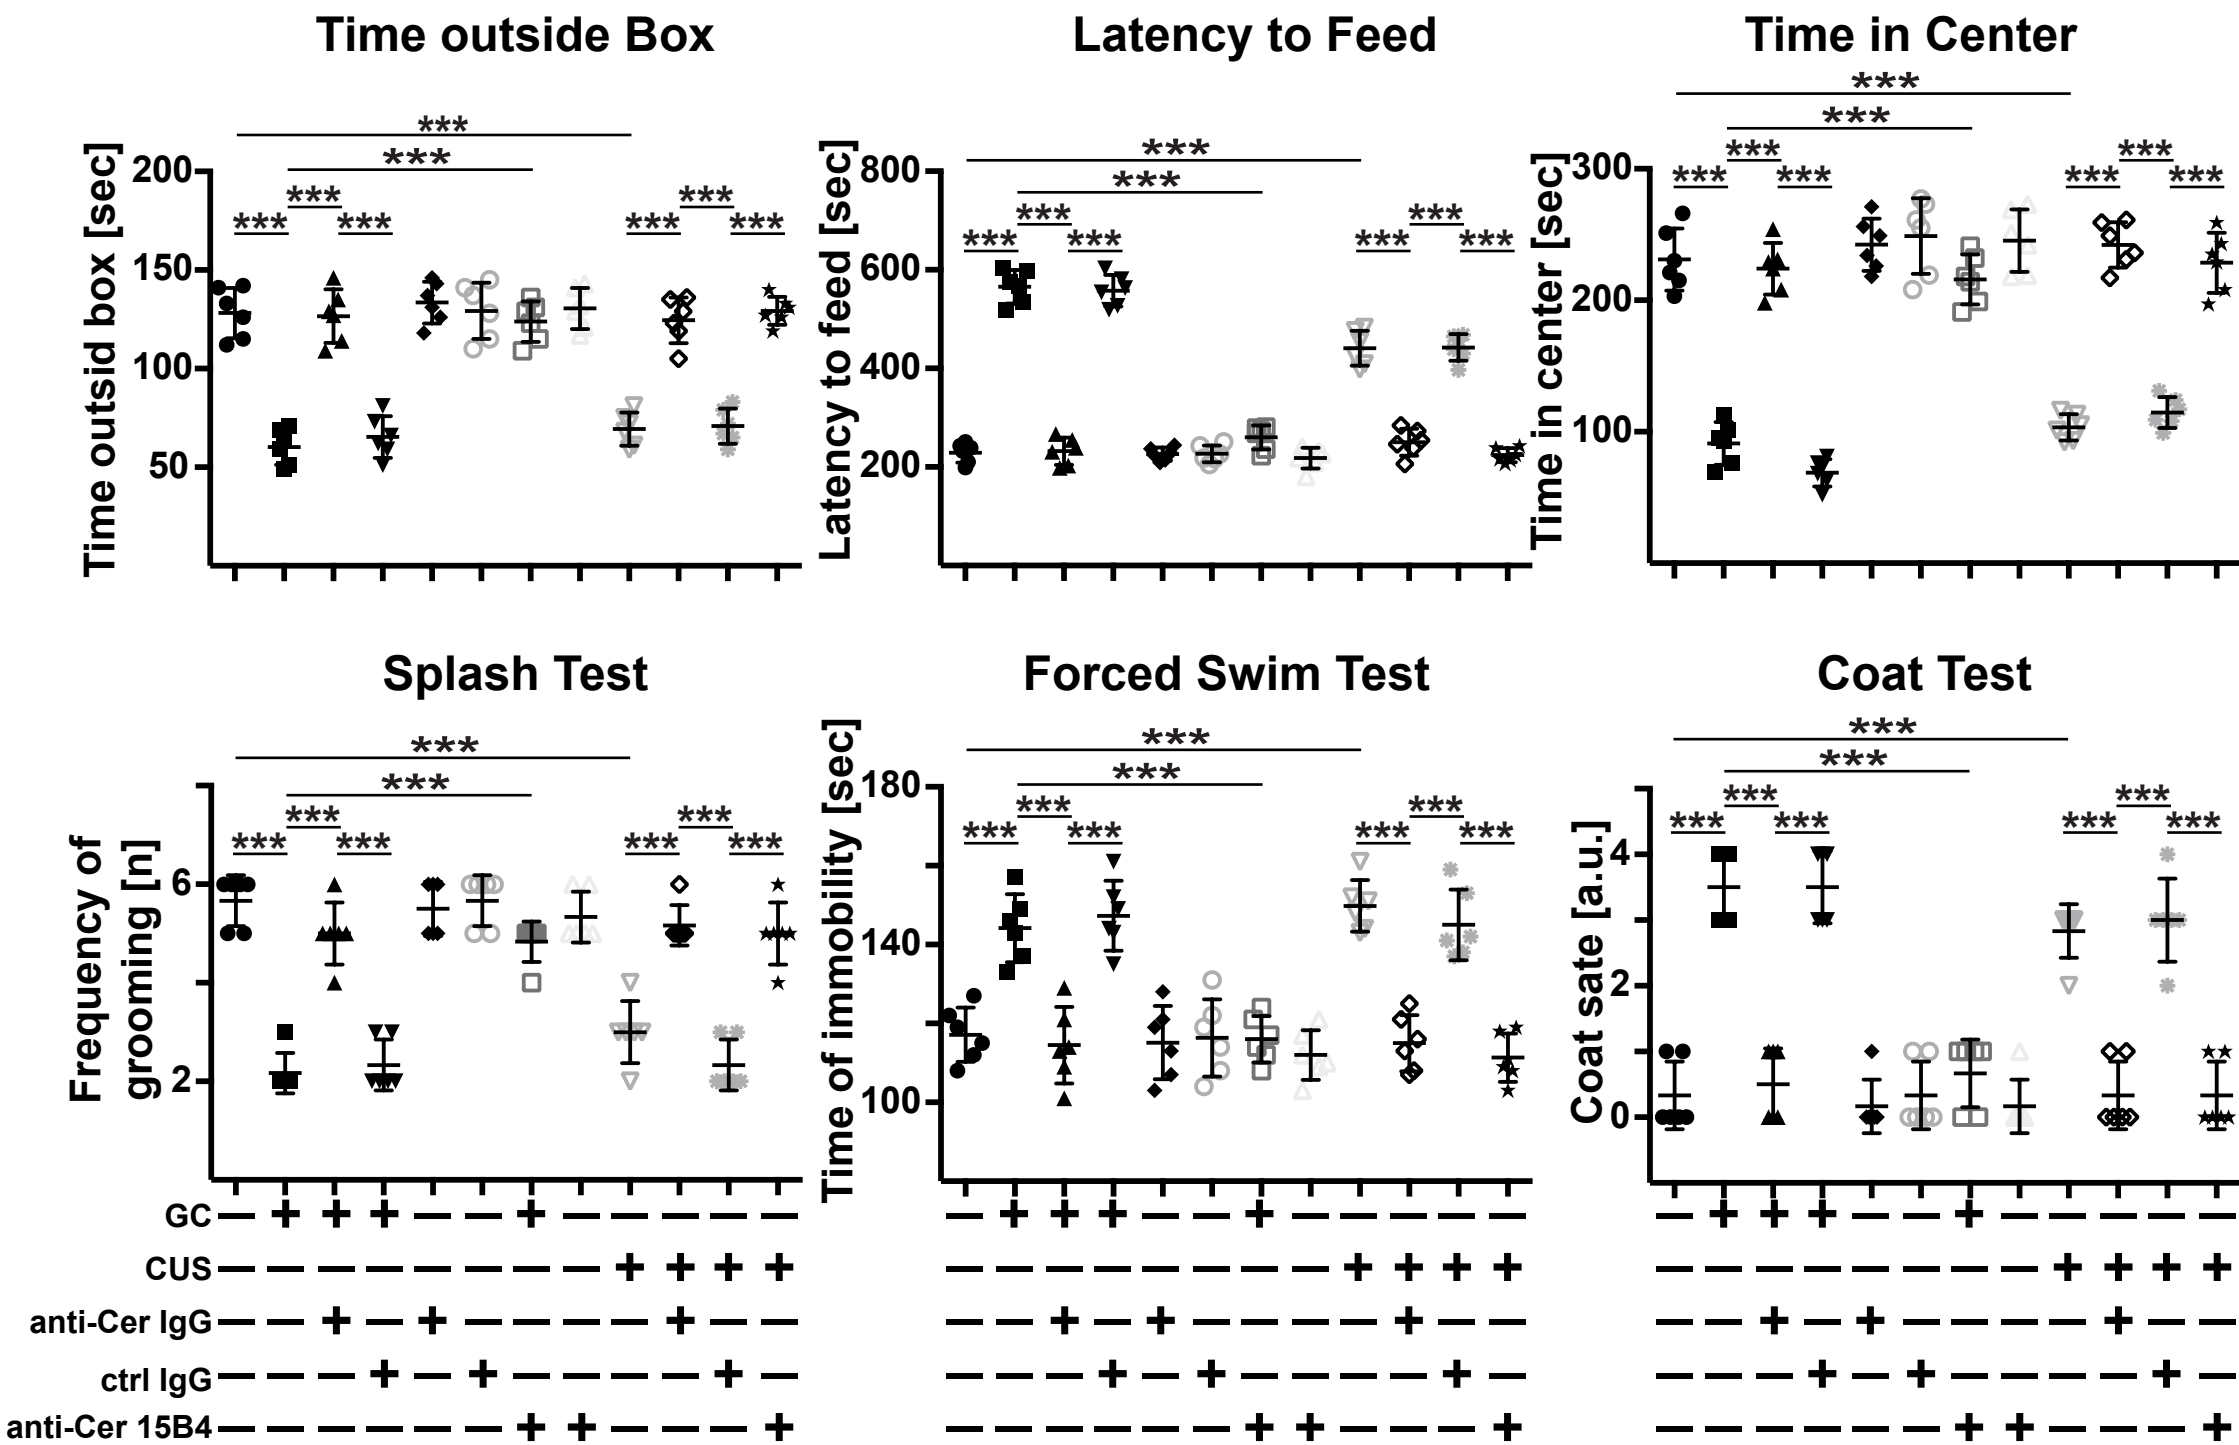

Supplement: mmc5.pdf [file mmc5.pdf]

**S-Fig. 4**

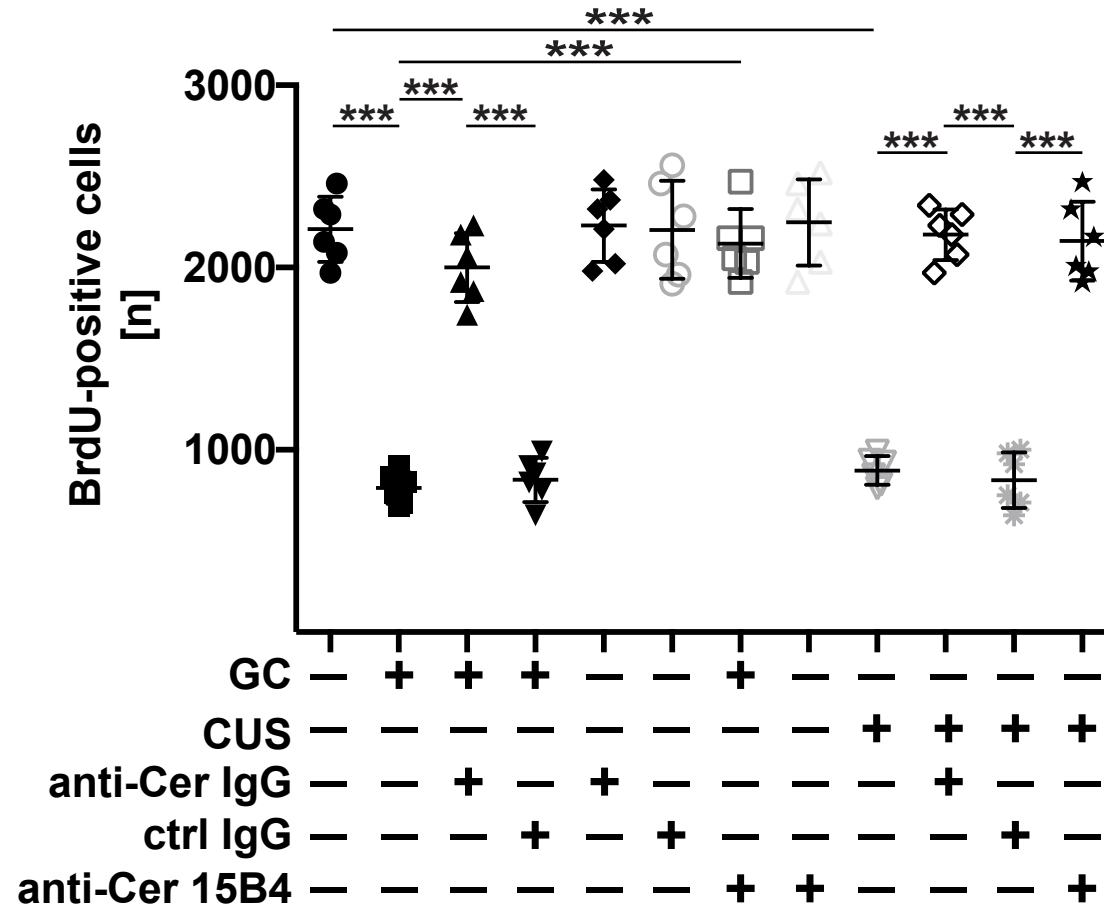

Supplement: mmc6.pdf [file mmc6.pdf]

**S-Fig. 6**

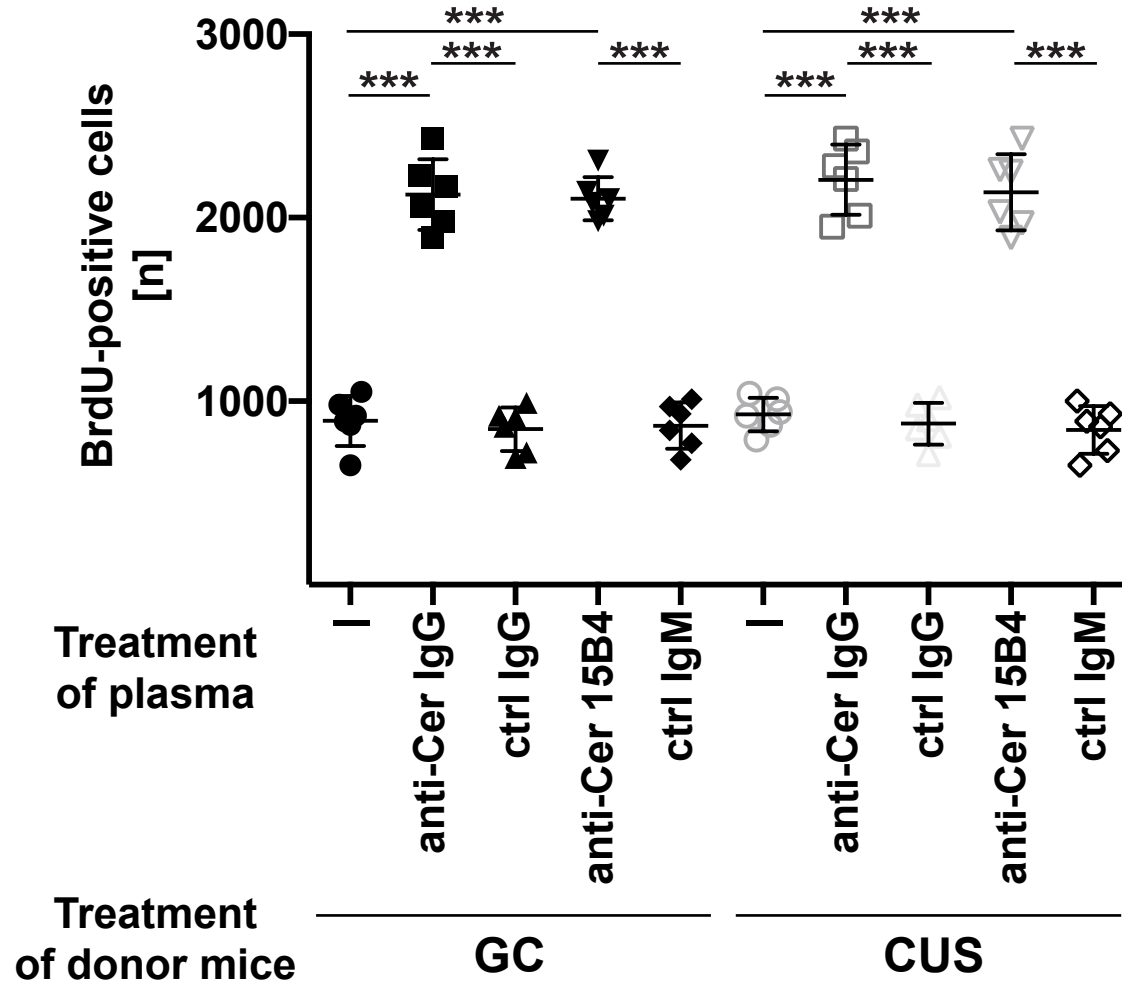

Supplement: mmc8.pdf [file mmc8.pdf]
